# Supplementary material for: Electrospinning of Cyclodextrin Nanofibers: The Effect of Process Parameters
Source: Hindawi journal article supplement (doi:10.1155/2020/7529306), 2020-06-15
Supplement: f1 [file 7529306.f1.docx]

Supporting Information

Electrospinning of Cyclodextrin Nanofibers: The Effect of Process Parameters

*Fuat Topuz1,* and Tamer Uyar1,2,**

*1 Institute of Materials Science & Nanotechnology and UNAM-National Nanotechnology Research Center, Bilkent University, Ankara 06800, Turkey*

*2 Department of Fiber Science & Apparel Design, College of Human Ecology, Cornell University, Ithaca, NY 14853, USA*

** To whom correspondence should be addressed: Dr. F. Topuz (*[*fuat.topuz@rwth-aachen.de*](mailto:fuat.topuz@rwth-aachen.de)*) and Prof. T. Uyar (*[*tu46@cornell.edu*](mailto:tu46@cornell.edu)*), Phone: +1 (607) 255-4658, Fax: +1(607) 255-1093*


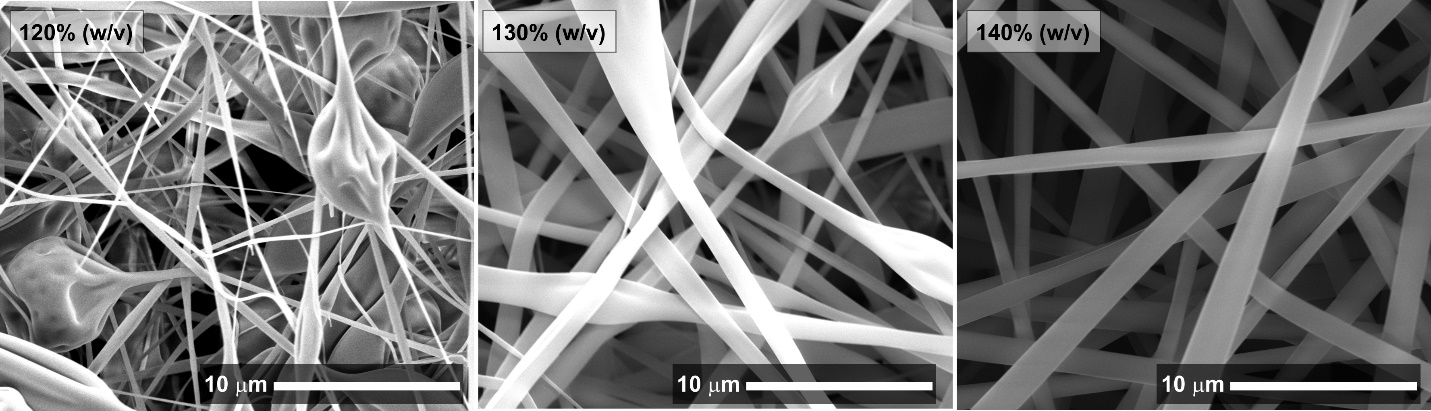


**Figure S1.** Scanning electron micrographs of the electrospun fibers of HP-**-CD produced at various concentrations from DMF solutions.


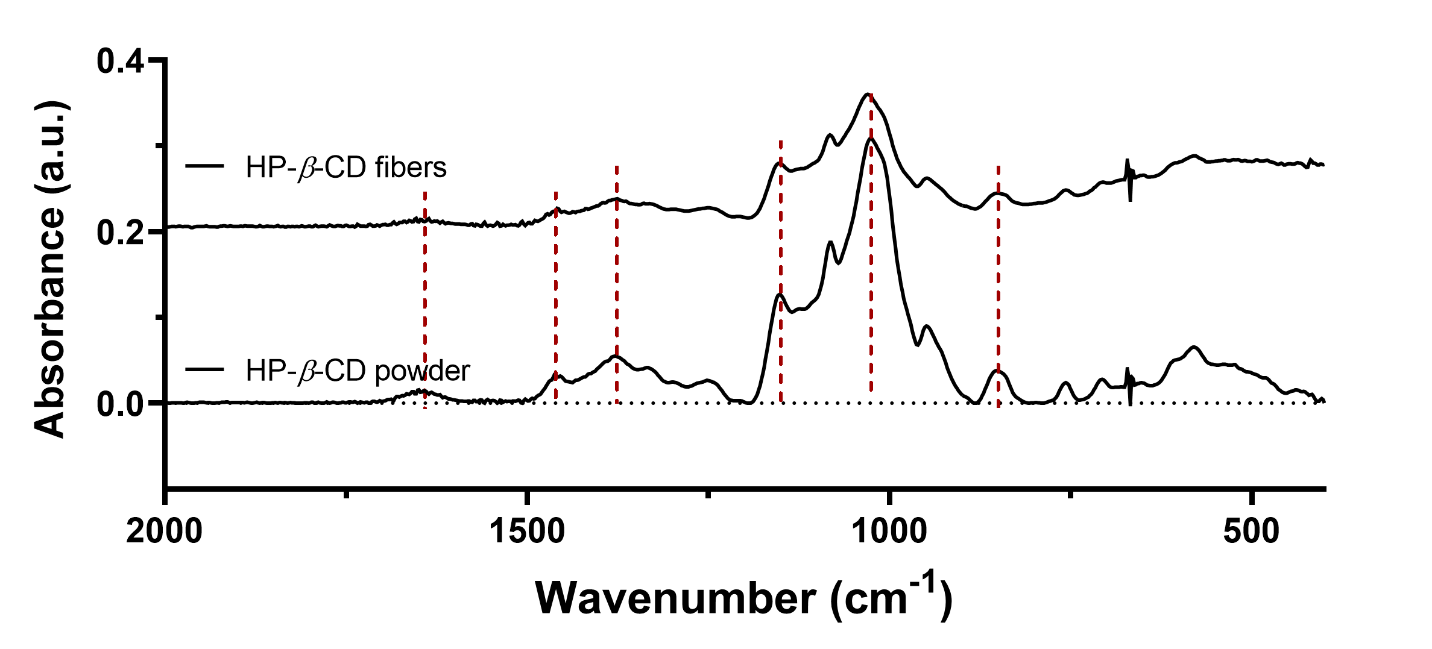


**Figure S2.** FTIR spectra of the HP-**-CD powder and nanofibers.
